# Supplementary material for: Hydroxide conducting BAB triblock copolymers tailored for durable high-performance anion exchange membranes
Source: Royal Society of Chemistry journal article supplement (doi:10.1039/d3ma00207a), 2023-01-01
Supplement: d3ma00207a1.pdf [file d3ma00207a1.pdf]

Electronic Supplementary Information (ESI)

## Hydroxide conducting BAB triblock copolymers tailored for durable high-performance anion exchange membranes

*Andrit Allushi, Pegah Mansouri Bakvand, Haiyue Gong  
and Patric Jannasch\**

*Polymer & Materials Chemistry, Department of Chemistry,  
Lund University, P.O. Box 124, SE-221 00, Lund, Sweden*

*\*E-mail: [patric.jannasch@chem.lu.se](mailto:patric.jannasch@chem.lu.se)*

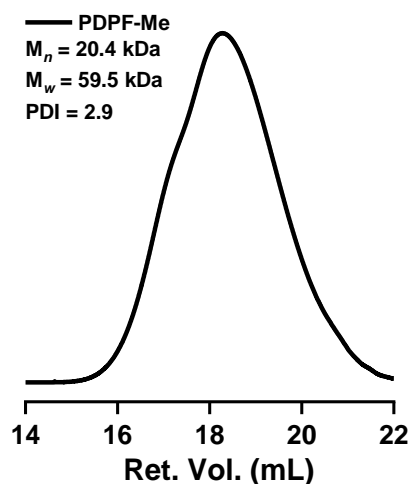

**Fig. S1.** SEC chromatogram of PDPF-Me with the  $M_n$ ,  $M_w$  and PDI data.

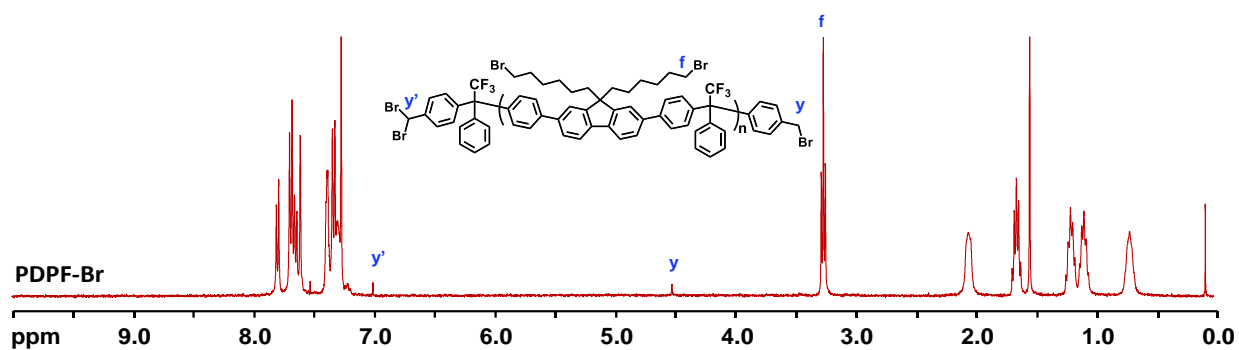

Fig. S2. <sup>1</sup>H NMR spectrum of PDPF-Br.

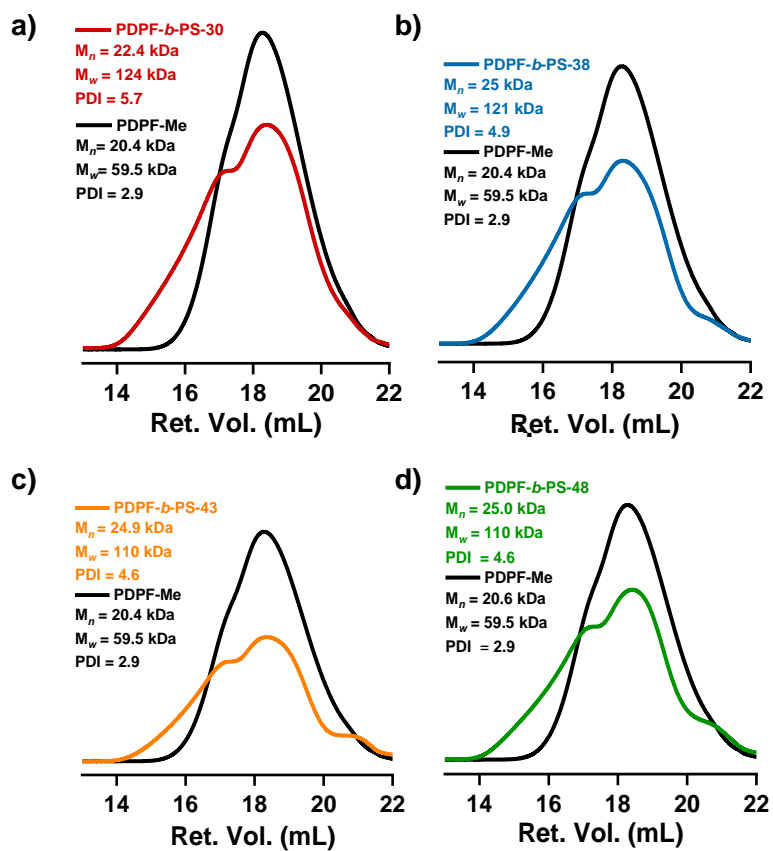

Fig. S3. SEC chromatograms of a) PDPF-*b*-PS-30, b) PDPF-*b*-PS-38, c) PDPF-*b*-PS-43, and d) PDPF-*b*-PS-48. Each panel includes the SEC trace of PDPF-Me for comparison, as well as the  $M_n$ ,  $M_w$  and PDI data.

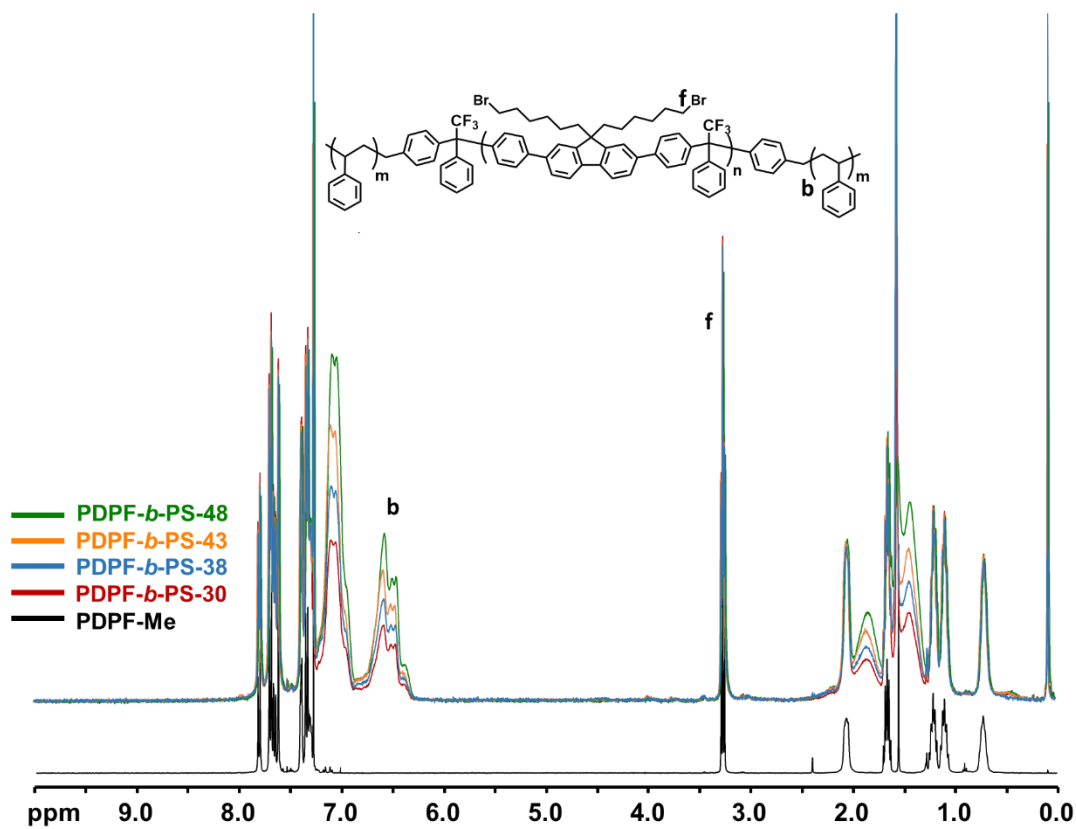

**Fig. S4.** The  $^1\text{H}$  NMR spectra of a) PDPF-*b*-PS-30, b) PDPF-*b*-PS-38, c) PDPF-*b*-PS-43, and d) PDPF-*b*-PS-48.

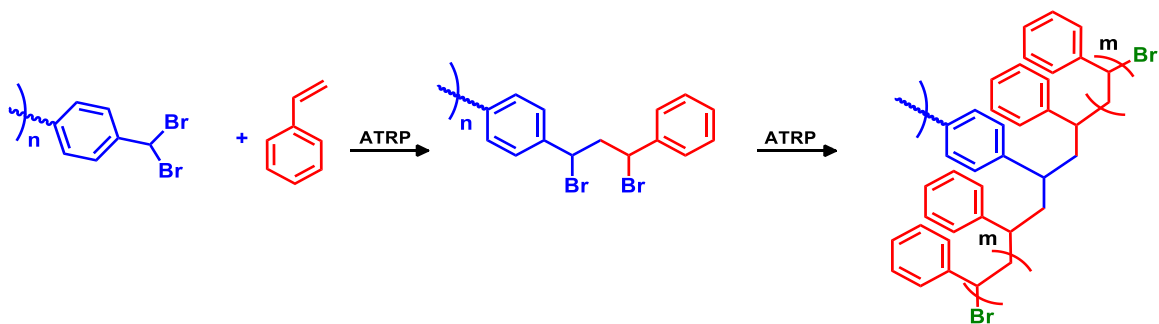

**Fig. S5.** The expected ATRP of styrene from of a dibrominated end group.

**Table S1.** Data from calculations of  $M_n$  values after assuming a random distribution of the double brominated sites.

| Precursor polymers  | PS content (wt%) | $M_n$ of blocks of PS ( $\text{kg mol}^{-1}$ ) | $M_n$ of block copolymer with single brominated side ( $\text{kg mol}^{-1}$ ) | $M_n$ of block copolymer with double brominated site at one end ( $\text{kg mol}^{-1}$ ) | $M_n$ of block copolymer with double brominated at both ends ( $\text{kg mol}^{-1}$ ) |
|---------------------|------------------|------------------------------------------------|-------------------------------------------------------------------------------|------------------------------------------------------------------------------------------|---------------------------------------------------------------------------------------|
| <b>PDPF-Me</b>      | 0                | 0                                              | 25.4                                                                          | 25.4                                                                                     | 25.4                                                                                  |
| <b>PDPF-b-PS-30</b> | 38               | 3.18                                           | 31.8                                                                          | 34.9                                                                                     | 38.1                                                                                  |
| <b>PDPF-b-PS-38</b> | 38               | 4.02                                           | 33.4                                                                          | 37.5                                                                                     | 41.5                                                                                  |
| <b>PDPF-b-PS-43</b> | 43               | 4.55                                           | 34.5                                                                          | 39.1                                                                                     | 43.6                                                                                  |
| <b>PDPF-b-PS-48</b> | 48               | 5.08                                           | 35.6                                                                          | 40.6                                                                                     | 45.7                                                                                  |

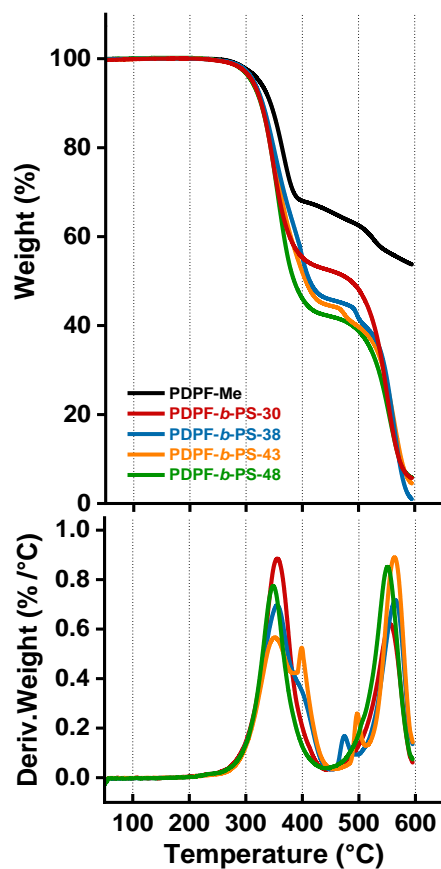

**Fig. S6.** TGA traces of the precursor BAB triblock copolymers in the PDPF-*b*-PS-*x* series (upper), and the corresponding first derivatives (lower).

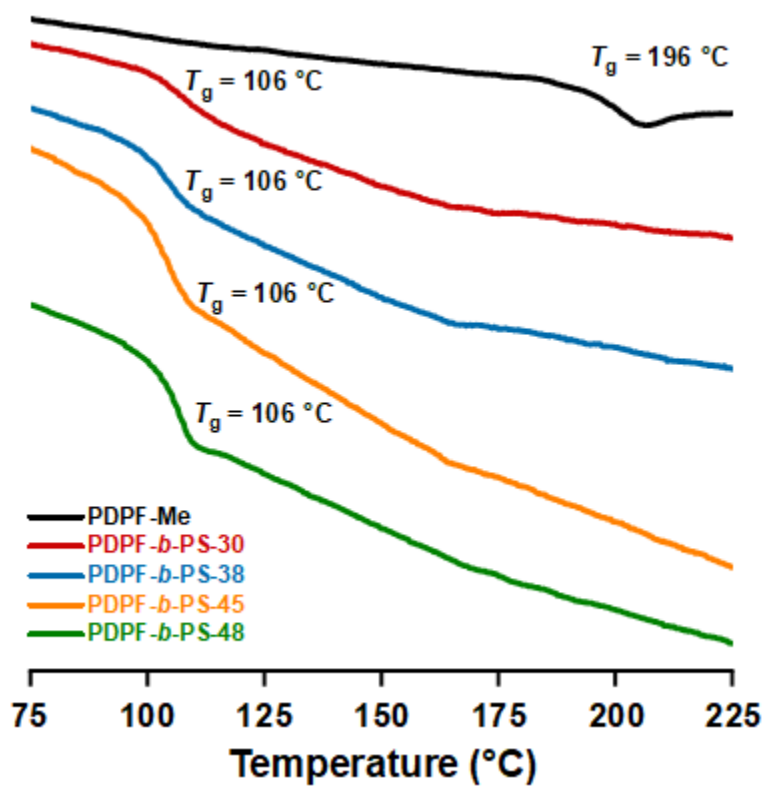

**Fig. S7.** DSC thermograms and  $T_g$  values of precursor copolymer PDPF-Me and the precursor BAB triblock copolymers in the PDPF-*b*-PS-*x* series.

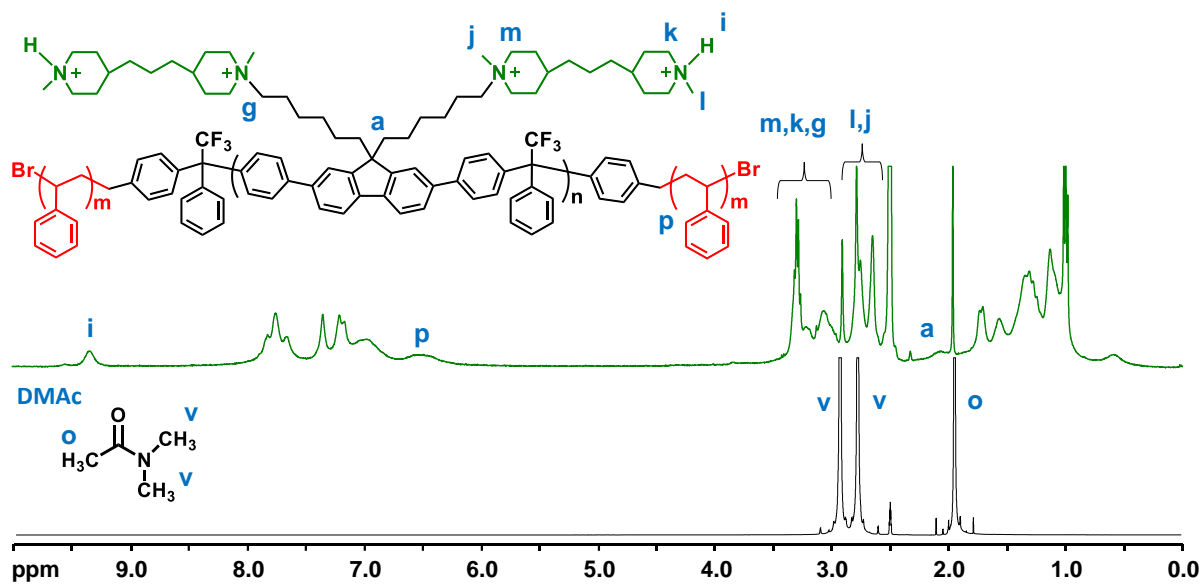

**Fig. S8.** Representative  $^1\text{H}$  NMR spectra of PDPF-*b*-PS-bisPip-int (top) and DMAC solvent (bottom).

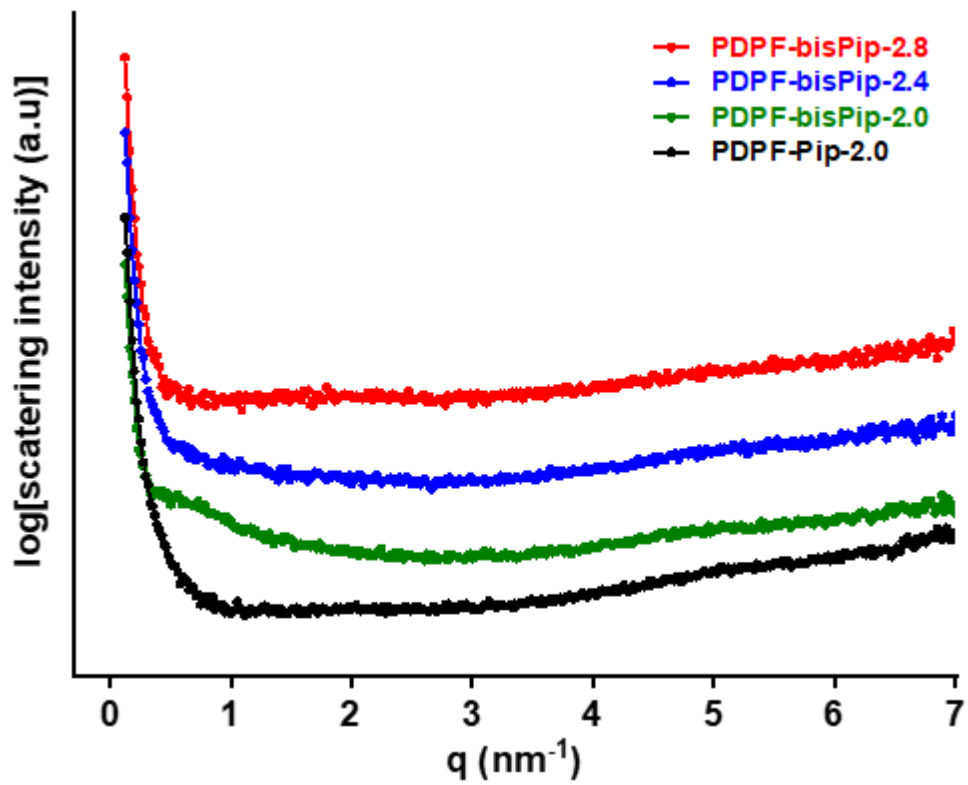

**Fig. S9.** SAXS profiles of the statistical block copolymer membranes functionalized with double pairs of piperidinium cations.<sup>1</sup>

#### References

1. A. Allushi, T. H. Pham and P. Jannasch, *Journal of Membrane Science*, 2021, **632**, 119376.
